# Supplementary material
Source: Springer Nature journal article supplement (https://www.springermedizin.de/resource/supplementary/13256_2009_1306_MOESM3_ESM.pdf/9647460)

.....1.....  
AATTGCAGC TGA  
-----  
-----  
AATTGCAGC TGA  
AATTGCAGC TGA

A A T T G C A G C T G ,

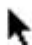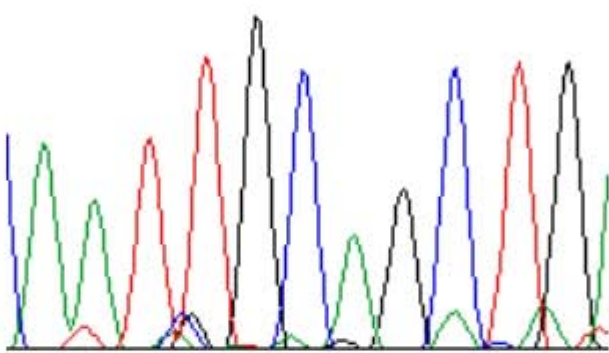

8

A A T T G C A G C T G

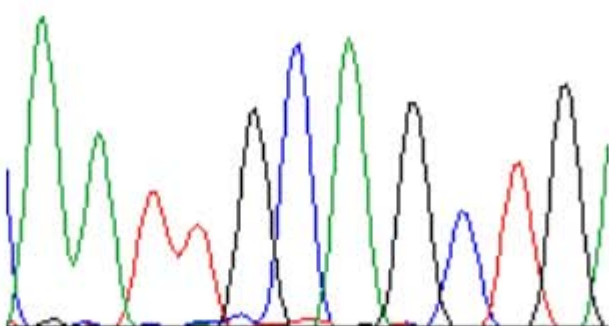

Supplement: MOESM3 [file 9647460]
